# Supplementary material for: Dual Delayed-Release Dexlansoprazole for Healing and Maintenance of Healed Erosive Esophagitis: A Safety Study in Adolescents
Source: Springer Nature journal article supplement (doi:10.1007/s10620-018-5325-8), 2018-11-02
Supplement: MOESM2 [file 16247106]

**Supplemental Table S1. Definition and severity of GERD symptoms assessed by the investigator**

| Variable | Definition |
| --- | --- |
| Symptom |  |
| Heartburn | A burning feeling in the mid-epigastric area and/or chest area |
| Acid regurgitation | Flow of sour or bitter fluid into the mouth |
| Dysphagia | Difficulty in swallowing |
| Belching | The voiding of gas from the stomach through the mouth, which may have been associated with acid regurgitation |
| Epigastric pain | Central upper abdominal pain |
| Severity |  |
| None | No symptoms |
| Mild | Symptom did not last long and was easily tolerated |
| Moderate | Symptom caused discomfort and/or interrupted usual activities (including sleep) |
| Severe | Symptom caused great interference with usual activities and may have been incapacitating (including sleep) |
| Very severe | Symptom caused intense and constant discomfort and/or marked interference with usual activities (including sleep) |
| Efficacy parameters |  |
| Healing rate | Percentage of patients who had healing of EE at week 8 among patients who had an endoscopy at week 8 |
| Maintenance rate | Percentage of patients who maintained healed EE from week 8 to week 24 among patients who were healed at week 8 and had an endoscopy at week 24  If a patient’s final endoscopy was performed before the week 24 visit and indicated recurrence of EE, the patient was considered to have recurrence of EE at the week 24 visit |
| Percentage of days with neither daytime nor nighttime heartburn | Number of heartburn-free days divided by the total number of days with a daytime or nighttime heartburn marked by patient in eDiary during treatment period |
| Percentage of days without nighttime heartburn | Number of days without nighttime heartburn divided by the total number of days with nighttime heartburn marked by patient in eDiary during treatment period |
| Percentage of days without daytime heartburn | Number of days without daytime heartburn divided by the total number of days with daytime heartburn marked by patient in eDiary during treatment period |
| eDiary=electronic diary; EE=erosive esophagitis; GERD=gastroesophageal reflux disease. | |
